# Supplementary material for: The Effect of Paddle Stroke Variables Measured by Trainesense SmartPaddle® on the Velocity of the Kayak
Source: MDPI journal article supplement (doi:10.3390/s22030938), 2022-01-26
Supplement: s1 [file s1]

Table S1. Left- and right-side comparison (mean (SD)) between strain-gauge shaft and SmartPaddle (n = 6).

|                      |                        | Left         | Right        | Total        |
|----------------------|------------------------|--------------|--------------|--------------|
| Maximal force [N]    | Strain-gauge shaft     | 139.3 (35.4) | 111.6 (27.1) | 125.4 (34.2) |
|                      | SmartPaddle            | 164.7 (57.5) | 139.9 (55.6) | 152.1 (57.4) |
|                      | p-value <sup>a</sup>   | .001         | < .001       |              |
|                      | Spearman's correlation | 0.79 **      | 0.88 **      |              |
| Force prod. time [s] | Strain-gauge shaft     | 0.44 (0.09)  | 0.43 (0.08)  | 0.43 (0.08)  |
|                      | SmartPaddle            | 0.45 (0.10)  | 0.44 (0.10)  | 0.44 (0.10)  |
|                      | p-value <sup>a</sup>   | .749         | .471         |              |
|                      | Spearman's correlation | 0.87 **      | 0.90 **      |              |
| Mean force [N]       | Strain-gauge shaft     | 94.1 (27.0)  | 76.7 (20.3)  | 85.4 (25.3)  |
|                      | SmartPaddle            | 88.2 (30.3)  | 78.6 (30.0)  | 83.3 (30.3)  |
|                      | p-value <sup>a</sup>   | .027         | .804         |              |
|                      | Spearman's correlation | 0.89 **      | 0.87 **      |              |

<sup>a</sup> Related-Samples Wilcoxon Signed Rank Test, \*\* Correlation is significant at the 0.01 level (2-tailed).

Table S2. Left- and right-side comparison between velocities (n = 14).

|                        | Velocity 1 |      |       |      |                      | Velocity 2 |      |       |      |                      | Velocity 3 |      |       |      |                      |
|------------------------|------------|------|-------|------|----------------------|------------|------|-------|------|----------------------|------------|------|-------|------|----------------------|
|                        | left       |      | right |      | p-value <sup>a</sup> | left       |      | right |      | p-value <sup>a</sup> | left       |      | right |      | p-value <sup>a</sup> |
|                        | Mean       | SD   | Mean  | SD   |                      | Mean       | SD   | Mean  | SD   |                      | Mean       | SD   | Mean  | SD   |                      |
| Maximal force [N]      | 128.5      | 40.3 | 96.7  | 29.8 | <b>.004</b>          | 156.7      | 41.3 | 133.5 | 36.6 | <b>.022</b>          | 231.1      | 67.7 | 218.7 | 70.0 | .695                 |
| Mean force [N]         | 63,6       | 17,1 | 59,7  | 19,0 | .363                 | 85,0       | 20,6 | 82,2  | 23,6 | .638                 | 115,2      | 31,2 | 116,5 | 34,5 | .075                 |
| Force prod. time [s]   | 0,46       | 0,06 | 0,46  | 0,07 | .582                 | 0,41       | 0,05 | 0,40  | 0,07 | .271                 | 0,34       | 0,06 | 0,33  | 0,08 | .306                 |
| Stroke rate [1/min]    | 38,5       | 6,6  | 37,2  | 7,9  | .091                 | 46,9       | 6,9  | 46,6  | 6,8  | .382                 | 60,6       | 8,7  | 58,6  | 11,2 | .575                 |
| Total impulse abs [Ns] | 64,4       | 16,7 | 52,8  | 15,3 | <b>.022</b>          | 73,1       | 15,6 | 65,2  | 15,5 | .064                 | 94,1       | 22,6 | 86,1  | 23,2 | .814                 |
| Impulse forward [%]    | 47,4       | 4,3  | 51,5  | 3,4  | <b>.033</b>          | 49,6       | 5,0  | 51,1  | 3,3  | .594                 | 48,0       | 3,5  | 51,5  | 3,9  | <b>.005</b>          |
| Impulse lateral [%]    | 28,0       | 6,3  | 29,5  | 3,2  | .422                 | 28,7       | 5,4  | 30,5  | 4,8  | .124                 | 31,8       | 5,8  | 32,3  | 4,6  | .937                 |
| Impulse vertical [%]   | 24,6       | 4,4  | 19,0  | 2,4  | <b>.002</b>          | 21,7       | 4,3  | 18,4  | 2,5  | <b>.016</b>          | 20,2       | 4,9  | 16,2  | 2,2  | <b>.005</b>          |

N = Newton, Ns = newton-second, <sup>a</sup> Related-Samples Wilcoxon Signed Rank Test
